# Supplementary material
Source: PubMed Central journal article supplement (PMC5020136)
Supplement: NIHMS814775-supplement-Supplemental_Info.pdf [file NIHMS814775-supplement-Supplemental_Info.pdf]

## Supplementary Online Content

Martinez-Hernandez E, Ariño H, McKeon A, et al. Clinical and immunologic investigations in patients with stiff-person spectrum disorders. *JAMA Neurol*. Published online April 11, 2016. doi:10.1001/jamaneurol.2016.0133.

### **eMaterial.**

**eTable 1.** Clinical Features According to the Type of Syndrome

**eTable 2.** Clinical Features of the Main Immunologic Groups With EMG Findings Consistent With SPS (Continuous Agonist-Antagonist Motor Unit Activity)

**eFigure.** Outcome According to the Clinical Syndrome and Immunologic Group

This supplementary material has been provided by the authors to give readers additional information about their work.

## **eMaterial**

### **Patients excluded after identifying a final diagnosis other than SPSD**

Patients with a final diagnosis of other disorders included, 6 cases with a functional disorder, 4 peripheral nerve hyperexcitability, 2 sporadic Creutzfeldt-Jacob disease, 2 amyotrophic lateral sclerosis, and one of each, tetanus, subacute combined spinal cord degeneration, primary progressive multiple sclerosis, Hashimoto encephalopathy, myotonia congenita, and myopathy.

### **Patients with immune mediated CNS disorders used as controls**

Among the 195 patients with other immune mediated CNS disorders used as controls, 75 (44 with paired CSF) had GAD65 antibodies and symptoms other than SPS (cerebellar ataxia, epilepsy, or limbic encephalitis); 55 (30 with CSF) multiple sclerosis; 55 (49 CSF) encephalitis associated to neuronal-surface antibodies (NMDA-receptor, LGI1, or GABA<sub>B</sub>-receptor), and 10 anti-Hu associated paraneoplastic symptoms.

### **Antibody assays**

Serum and CSF were examined for GAD65 and amphiphysin antibodies using frozen sections of paraformaldehyde (PFA) perfused sagittal sections of rat brain, as reported.<sup>1</sup> The presence of GAD65 antibodies was confirmed with cell-based assay (CBA) as described,<sup>2</sup> and amphiphysin antibodies were confirmed with immunoblot. GlyR and GABA<sub>A</sub>R antibodies were determined with live CBAs as reported.<sup>3,4</sup> Antibodies to gephyrin were determined by CBA using HEK293 cells expressing (transfection ratio 1:1) cherry-labeled human Gephyrin and hPEM2 or collybistin, a protein necessary for membrane anchorage of gephyrin. HEK293 cells were fixed for 10 minutes in 4% PFA, permeabilized, and incubated with patients' serum (1:40) or CSF (1:5) overnight at 4°C, followed by the secondary Alexa Fluor 488 goat anti-human antibody (1:1000, A11013 Molecular

© 2016 American Medical Association. All rights reserved.

Probes/ Life Technologies). Antibodies to the Glycine transporters 1 and 2 (GlyT1, GlyT2) were determined using HEK293 cells expressing myc-tagged human GlyT1 or GlyT2. Cells were incubated with patients' serum (1:40) or CSF (1:5) for 1 hour at 37°C, fixed and permeabilized, and serially incubated with a myc-tag mouse monoclonal antibody (1:5000, 2276, Cell Signaling Technology, Inc.), the indicated anti-human secondary antibody, and Alexa Fluor 594 goat anti-mouse (11005, Molecular Probes/Life Technologies).

Additional antibodies against neuronal cell surface proteins were determined in serum and CSF using an immunofluorescence assay with dissociated rat hippocampal neuronal cultures as reported.<sup>5</sup> Positive cases were tested for antibodies to DPPX or other antigens (NMDAR, AMPAR, GABABR, Caspr2, LGI1) by CBAs, as reported.<sup>6</sup> Results were photographed under fluorescence microscopy (Zeiss Axioimager M2) using Zeiss Axiovision software (Zeiss, Oberkochen, Germany).

### **Summary of 5 patients with antibodies other than GAD65 or GlyR**

Five patients without GAD65 and GlyR antibodies had autoantibodies against other known antigens (2 amphiphysin, 2 GABAaR, and 1 DPPX). One of the two patients with amphiphysin antibodies had SPS with limbic encephalitis and breast cancer, and the other had SLS in association with breast cancer. The patient with DPPX antibodies developed SPS along with hyperekplexia, myoclonus, upper motor neuron dysfunction, sensory symptoms, orthostatic hypotension and prominent pruritus, all symptoms preceded by diarrhea and 15% weight loss. The 4 patients with GABAaR antibodies (2 of them with concurrent GAD65 antibodies) were young male (median 20 years, range 12-46) who developed classic SPS (n=2), SLS (n=1), and overlapping SPS with epilepsy (n=1, discussed above); these cases have been previously reported.<sup>4</sup>

## eReferences

1. Saiz A, Arpa J, Sagasta A, et al. Autoantibodies to glutamic acid decarboxylase in three patients with cerebellar ataxia, late-onset insulin-dependent diabetes mellitus, and polyendocrine autoimmunity. *Neurology*. 1997;49(4):1026-1030.
2. Ariño H, Gresa-Arribas N, Blanco Y, et al. Cerebellar Ataxia and Glutamic Acid Decarboxylase Antibodies: Immunologic Profile and Long-term Effect of Immunotherapy. *JAMA Neurol*. 2014;71(8):1009-1016.
3. Martinez-Hernandez E, Sepulveda M, Rostásy K, et al. Antibodies to Aquaporin 4, Myelin-Oligodendrocyte Glycoprotein, and the Glycine Receptor  $\alpha 1$  Subunit in Patients With Isolated Optic Neuritis. *JAMA Neurol*. 2015;72(2):187-193.
4. Petit-Pedrol M, Armangue T, Peng X, et al. Encephalitis with refractory seizures, status epilepticus, and antibodies to the GABAA receptor: A case series, characterisation of the antigen, and analysis of the effects of antibodies. *Lancet Neurol*. 2014;13(3):276-286.
5. Lancaster E, Lai M, Peng X, et al. Antibodies to the GABAB receptor in limbic encephalitis with seizures: case series and characterisation of the antigen. *Lancet Neurol*. 2010;9(1):67-76.
6. Boronat A, Gelfand JM, Gresa-Arribas N, et al. Encephalitis and antibodies to dipeptidyl-peptidase-like protein-6, a subunit of Kv4.2 potassium channels. *Ann Neurol*. 2013;73(1):120-128.

**eTable 1.** Clinical Features According to the Type of Syndrome

| <b>Clinical features</b>                  | <b>SPS<br/>N=50 (41%)</b> | <b>SLS<br/>N=24 (20%)</b> | <b>SPS-plus<br/>N=37<br/>(31%)</b> | <b>Overlapping<br/>syndromes<br/>N=10 (8%)</b> | <b>p value</b> |
|-------------------------------------------|---------------------------|---------------------------|------------------------------------|------------------------------------------------|----------------|
| Female sex (%)                            | 30 (60)                   | 18 (75)                   | 20 (54)                            | 7 (70)                                         | 0.38           |
| Age at onset,<br>median years (IQR)       | 47 (38-56)                | 47 (45-58)                | 60 (44-66)                         | 52 (28-63)                                     | 0.055          |
| Delay to diagnosis,<br>median years (IQR) | 2 (1-5)                   | 1 (0-3)                   | 1 (0-2.5)                          | 3 (0.5-5)                                      | 0.151          |
| Systemic<br>autoimmune<br>disorders       | 26 (52)                   | 13 (54)                   | 13 (35)                            | 4 (40)                                         | 0.51           |
| Cancer                                    | 0 (0)                     | 1 (4)                     | 1 (3)                              | 1 (10)                                         | 0.49           |
| CMUA on EMG                               | 21/32 (65.6)              | 10/19 (53)                | 17/28 (61)                         | 4/5 (80)                                       | 0.49           |
| CSF pleocytosis                           | 4/24 (17)                 | 0/11 (0)                  | 10/28 (36)                         | 1/6 (17)                                       | 0.017          |
| CSF OCBs                                  | 7/23 (30)                 | 1/13 (8)                  | 9/24 (38)                          | 1/3 (33)                                       | 0.17           |
| Antibodies:                               |                           |                           |                                    |                                                | 0.002          |
| GAD65                                     | 27 (54)                   | 10 (42)                   | 7 (19)                             | 8 (80)                                         |                |
| GlyR <sup>a</sup>                         | 5 (10)                    | 5 (21)                    | 12 (32)                            | 0 (0)                                          |                |
| Other                                     | 1 (2)                     | 2 (8)                     | 1 (3)                              | 1 (10)                                         |                |
| Maximum mRS<br>score, median<br>(IQR)     | 4 (2.5-4)                 | 3 (2-4)                   | 4 (3-5)                            | 4 (2-5)                                        | 0.002*         |
| Symptomatic<br>treatment                  | 42 (84)                   | 16 (67)                   | 21 (57)                            | 5 (50)                                         | 0.006          |
| Type of<br>immunotherapy:                 |                           |                           |                                    |                                                | 0.009          |
| Non-treated                               | 10 (26)                   | 6 (32)                    | 1 (3)                              | 1 (13)                                         |                |
| First line only                           | 19 (50)                   | 9 (47)                    | 10 (31)                            | 3 (37)                                         |                |
| First line and long-                      | 5 (13)                    | 1 (5)                     | 10 (31)                            | 0 (0)                                          |                |

© 2016 American Medical Association. All rights reserved.

|                                       |            |              |            |                 |      |
|---------------------------------------|------------|--------------|------------|-----------------|------|
| term oral                             |            |              |            |                 |      |
| First and second line                 | 4 (10)     | 2 (11)       | 9 (28)     | 4 (50)          |      |
| Other                                 | 1 (3)      | 1 (5)        | 2 (6)      | 0 (0)           |      |
| Cases with follow-up                  | 34 (68)    | 14 (58)      | 29 (78)    | 5 (50)          | 0.22 |
| Follow-up period, median months (IQR) | 17 (11-66) | 54 (12-72)   | 18 (9-42)  | 24 (15-37)      | 0.54 |
| Relapsing course                      | 9 (26.5)   | 3 (21)       | 12 (41)    | 2 (40)          | 0.61 |
| Final mRS score, median (IQR)         | 2 (1-3)    | 2 (1-3)      | 2 (1-5)    | 3.5 (2-5)       | 0.39 |
| Change in mRS score, median (IQR)     | 1 (0 - 1)  | 1 (0.75 - 2) | 2 (-1 - 3) | 0.5 (-0.75 - 1) | 0.51 |

CMUA: continuous motor unit activity; IQR: interquartile range; mRS: modified Rankin scale;

OCBs: oligoclonal bands; SLS: stiff-limb syndrome; SPS: stiff-person syndrome; SPS-plus: progressive encephalomyelitis with rigidity, myoclonus, or other symptoms.

<sup>a</sup> Two additional patients had concurrent GAD65 and GlyR antibodies

\* Mann-Whitney U test: maximum mRS SP-plus vs SPS p=0.001, SPS-plus vs SLS p=0.002, SPS-plus vs overlapping syndromes p=1

**eTable 2.** Clinical Features of the Main Immunologic Groups With EMG Findings Consistent With SPS (Continuous Agonist-Antagonist Motor Unit Activity)

| Clinical features                          | GAD65+<br>N=26<br>(54%) | GlyR+ N=6 <sup>a</sup><br>(13%) | Antibody-negative<br>N=16 (33%) | p value |
|--------------------------------------------|-------------------------|---------------------------------|---------------------------------|---------|
| Female sex (%)                             | 23 (88)                 | 1 (17)                          | 8 (50)                          | 0.001   |
| Age at onset, median years (IQR)           | 54 (45-65)              | 52 (33-62)                      | 47 (36-63)                      | 0.38    |
| Delay to diagnosis, median years (IQR)     | 2 (1-4)                 | 0 (0-2)                         | 1.5 (0.5-5)                     | 0.10    |
| Syndrome:                                  |                         |                                 |                                 | 0.005   |
| SPS                                        | 13 (50)                 | 0 (0)                           | 7 (44)                          |         |
| SLS                                        | 7 (27)                  | 0 (0)                           | 2 (12)                          |         |
| SPS-plus                                   | 3 (11)                  | 6 (100)                         | 6 (38)                          |         |
| Overlapping syndromes                      | 3 (11)                  | 0 (0)                           | 1 (6)                           |         |
| Hyperekplexia                              | 9 (35)                  | 5 (83)                          | 4 (25)                          | 0.021   |
| Myoclonus                                  | 2 (8)                   | 4 (67)                          | 3 (19)                          | 0.014   |
| Brainstem                                  | 2 (8)                   | 6 (100)                         | 2 (13)                          | <0.001  |
| Pyramidal                                  | 1 (4)                   | 4 (67)                          | 5 (31)                          | 0.001   |
| Sphincter                                  | 1 (4)                   | 3 (50)                          | 5 (31)                          | 0.039   |
| Sensory                                    | 0 (0)                   | 3 (50)                          | 2 (13)                          | 0.013   |
| Autonomic                                  | 2 (8)                   | 4 (67)                          | 2 (13)                          | 0.034   |
| Insomnia                                   | 2 (8)                   | 4 (67)                          | 1 (6)                           | 0.013   |
| Systemic autoimmune disorders <sup>b</sup> | 18 (69)                 | 3 (50)                          | 6 (38)                          | 0.25    |
| CSF pleocytosis                            | 2/11 (18)               | 2/6 (33)                        | 1/11 (9)                        | 0.029   |
| CSF OCBs                                   | 6/14 (42)               | 1/6 (17)                        | 0/6 (0)                         | 0.016   |
| Maximum mRS score, median (IQR)            | 4 (3-4)                 | 5 (4-5)                         | 4 (3-5)                         | 0.012*  |
| Symptomatic treatment                      | 26 (100)                | 4 (67)                          | 12 (75)                         | 0.007   |
| Type of immunotherapy:                     |                         |                                 |                                 | 0.05    |
| Non-treated                                | 5 (19)                  | 0 (0)                           | 2 (13)                          |         |
| First line only                            | 12 (46)                 | 0 (0)                           | 6 (38)                          |         |
| First line and long-term oral              | 4 (15)                  | 3 (50)                          | 2 (12.5)                        |         |
| First and second line                      | 3 (12)                  | 3 (50)                          | 0 (0)                           |         |
| Other                                      | 1 (4)                   | 0 (0)                           | 1 (6)                           |         |
| Cases with follow-up                       | 25 (96)                 | 6 (100)                         | 11 (69)                         | 0.034   |
| Follow-up period, median months (IQR)      | 32 (11-72)              | 27 (9-129)                      | 48 (12-75)                      | 0.91    |
| Relapsing course                           | 11 (44)                 | 3 (50)                          | 5 (45)                          | 1       |
| Final mRS score, median (IQR)              | 2.5 (1-3)               | 1.5 (1-5)                       | 2.5 (1.5-5)                     | 0.68    |

© 2016 American Medical Association. All rights reserved.

|                                   |            |               |                 |      |
|-----------------------------------|------------|---------------|-----------------|------|
| Improvement:                      |            |               |                 | 0.70 |
| Treated                           | 16/20 (80) | 4/6 (67)      | 5/9 (56)        |      |
| Non-treated                       | 2/5 (40)   | 0 (0)         | 1/2 (50)        |      |
| Change in mRS score, median (IQR) | 1 (0 - 2)  | 3 (-0.25 - 4) | 0.5 (-0.25 - 2) | 0.24 |

IQR: interquartile range; mRS: modified Rankin scale; SLS: stiff-limb syndrome; SPS: stiff-person syndrome; SPS-plus: progressive encephalomyelitis with rigidity, myoclonus, or other symptoms.

<sup>a</sup> Excludes 1 patient with concurrent GAD and GlyR antibodies

<sup>b</sup> 27 patients (56%): including 6 with type I diabetes mellitus, 6 thyroiditis, 1 celiac disease, 1 psoriasis, 1 vitiligo, 1 Raynaud syndrome, and 11 had thyroid, ANA, dsDNA or gastric parietal cell antibodies

\* Mann-Whitney U test: maximum mRS score GAD65+ vs GlyR p=0.002, GAD65+ vs Ab-neg p=0.22, GlyR+ vs Ab-neg p=0.037



**eFigure.** Outcome According to the Clinical Syndrome and Immunologic Group

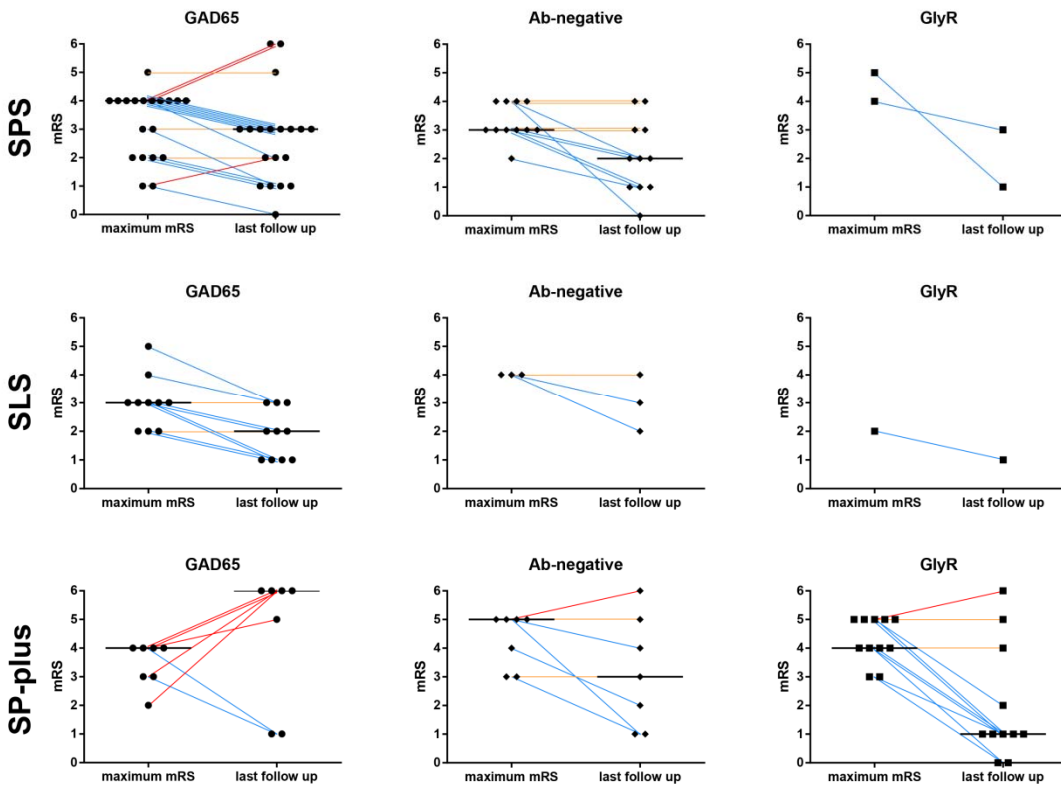

Patients' maximum mRS score compared with the score at the last follow-up according to the main syndromes: first row stiff-person syndrome (SPS), second row stiff-limb syndrome (SLS), and third row stiff-person syndrome plus (SPS-plus); and according to the immunologic group: first column GAD65 antibodies, second column antibody-negative (Ab-neg), and third column GlyR antibodies. Improvement for each individual patient is depicted in blue, deterioration in red, and no change in orange. The median mRS is provided as a horizontal black line (only provided if  $n \geq 5$ ). In multivariable analysis on group level, presence of GAD65 antibodies was associated with less favorable outcome (Table 2).
